# Supplementary material for: sc-eQTL unveil Immunogenetic Architecture of Polycystic Ovary Syndrome
Source: Research Square preprint supplement (doi:10.21203/rs.3.rs-6942288/v1), 2025-10-21
Supplement: Supplementary file 1 [file a7170d39ecbc4e46c543b5b8.xlsx]

## Sheet: Supplementary Table S1
Supplementary Table S1. Independent risk locis clumped using PLINK (clump-r2 = 0.3, clump-kb = 250) based on genome-wide significance (P < 5e-8).
Loci	Lead SNP	P-value	Effect Size	SE
chr2-212496910-212535309	rs2178575	3.344e-14	0.1663	0.0219
chr11-30193714-30240421	rs11031005	8.664e-13	-0.1593	0.0223
chr11-30274508-30361352	rs4071559	5.431e-11	0.1397	0.0213
chr11-102123167-102220513	rs11225154	5.438e-11	0.1787	0.0272
chr9-123807373-123903778	rs9696009	7.958e-11	0.202	0.0311
chr5-132454924-132499703	rs13164856	1.453e-10	0.1235	0.0193
chr9-123730546-123806897	rs4620350	1.504e-10	-0.1986	0.031
chr11-114068817-114084956	rs1784692	1.876e-10	0.1438	0.0226
chr2-43334632-43334641	rs7563201	3.678e-10	-0.1081	0.0172
chr11-30373901-30415237	rs12223987	6.157e-10	0.1336	0.0216
chr16-52322880-52345045	rs8043701	9.61e-10	-0.1273	0.0208
chr2-212430962-212467117	rs112599092	1.003e-09	-0.1631	0.0267
chr12-75500085-75594107	rs1795379	1.808e-09	-0.1174	0.0195
chr12-56034024-56114625	rs2271194	4.568e-09	0.0971	0.0166
chr9-5440589-5446078	rs10739076	2.51e-08	0.1097	0.0197
chr20-32783871-32880307	rs242547	2.626e-08	0.0932	0.0167
chr9-94915274-94969974	rs7864171	2.946e-08	-0.0933	0.0168
chr9-94865485-94908276	rs2183958	3e-08	0.0917	0.0165
chr12-55970537-56023144	rs10876864	3.229e-08	-0.0909	0.0165

## Sheet: Supplementary Table S2
Supplementary Table S2. Candidate causal genes prioritized by chromosomal positional mapping of lead SNP of PCOS risk loci.​
Gene name	Category	Lead SNP	Loci
ZBTB16	Immune-related	rs1784692	chr11-114068817-114084956
ARL14EP	Immune-related	rs4071559	chr11-30274508-30361352
IKZF4	Immune-related	rs10876864	chr12-55970537-56023144
IRF1	Immune-related	rs13164856	chr5-132454924-132499703
PLGRKT	Immune-related	rs10739076	chr9-5440589-5446078
FSHB	Metabolic-related	rs11031005	chr11-30193714-30240421
TOX3	Metabolic-related	rs8043701	chr16-52322880-52345045
ERBB4	Metabolic-related	rs112599092	chr2-212430962-212467117
ERBB4	Metabolic-related	rs2178575	chr2-212496910-212535309
THADA	Metabolic-related	rs7563201	chr2-43334632-43334641
DENND1A	Metabolic-related	rs4620350	chr9-123730546-123806897
DENND1A	Metabolic-related	rs9696009	chr9-123807373-123903778
YAP1	Other	rs11225154	chr11-102123167-102220513
MPPED2	Other	rs12223987	chr11-30373901-30415237
ERBB3	Other	rs2271194	chr12-56034024-56114625
KRR1	Other	rs1795379	chr12-75500085-75594107
MAPRE1	Other	rs242547	chr20-32783871-32880307
AOPEP	Other	rs2183958	chr9-94865485-94908276
AOPEP	Other	rs7864171	chr9-94915274-94969974

## Sheet: Supplementary Table S3
Supplementary Table S3. 95% credible sets of putative causal variants derived from fine-mapping of risk locis using SuSiEx.
SNP	PIP	loci	P-value	Effect Size
rs1784692	0.561321	chr11-114068817-114084956	1.876e-10	0.1438
rs1791800	0.392977	chr11-114068817-114084956	2.672e-10	-0.1438
rs10835644	0.0163863	chr11-30274508-30361352	1.046e-10	0.1408
rs10835645	0.0150239	chr11-30274508-30361352	1.152e-10	0.1405
rs10835646	0.0150239	chr11-30274508-30361352	1.148e-10	0.1405
rs10835649	0.0165683	chr11-30274508-30361352	1.102e-10	-0.1389
rs10835655	0.0184022	chr11-30274508-30361352	9.371e-11	0.1412
rs10835658	0.0141806	chr11-30274508-30361352	1.327e-10	0.1403
rs11031033	0.0195037	chr11-30274508-30361352	9.1e-11	0.1414
rs11031034	0.0228869	chr11-30274508-30361352	7.056e-11	0.1426
rs11031035	0.0154646	chr11-30274508-30361352	1.132e-10	-0.1406
rs11031039	0.0159186	chr11-30274508-30361352	1.095e-10	0.1407
rs11031040	0.027449	chr11-30274508-30361352	6.152e-11	-0.1393
rs11031047	0.0243476	chr11-30274508-30361352	6.787e-11	0.1389
rs11031052	0.016868	chr11-30274508-30361352	1.045e-10	0.1409
rs11031056	0.0154646	chr11-30274508-30361352	1.193e-10	0.1406
rs11512201	0.0178755	chr11-30274508-30361352	9.627e-11	0.1411
rs12271187	0.0282857	chr11-30274508-30361352	5.853e-11	0.1394
rs12271300	0.027449	chr11-30274508-30361352	5.968e-11	0.1393
rs12272134	0.0173643	chr11-30274508-30361352	1.004e-10	-0.141
rs12278112	0.016868	chr11-30274508-30361352	1.033e-10	-0.1409
rs12278547	0.0184022	chr11-30274508-30361352	9.457e-11	-0.1412
rs12278989	0.027449	chr11-30274508-30361352	6.055e-11	-0.1393
rs12281078	0.0154646	chr11-30274508-30361352	1.116e-10	-0.1406
rs12285277	0.014596	chr11-30274508-30361352	1.219e-10	-0.1404
rs12294258	0.0154646	chr11-30274508-30361352	1.114e-10	0.1406
rs12361594	0.0150239	chr11-30274508-30361352	1.128e-10	0.1405
rs12363432	0.0141806	chr11-30274508-30361352	1.311e-10	0.1403
rs12363824	0.0291486	chr11-30274508-30361352	5.83e-11	0.1395
rs12364889	0.0212841	chr11-30274508-30361352	8.55e-11	-0.1417
rs12365913	0.014596	chr11-30274508-30361352	1.235e-10	-0.1404
rs141402489	0.0178755	chr11-30274508-30361352	9.922e-11	0.1411
rs3858429	0.0250876	chr11-30274508-30361352	6.684e-11	0.139
rs4071558	0.027449	chr11-30274508-30361352	6.115e-11	0.1393
rs4071559	0.0309562	chr11-30274508-30361352	5.431e-11	0.1397
rs4071563	0.0250876	chr11-30274508-30361352	6.675e-11	0.139
rs4120817	0.0154646	chr11-30274508-30361352	1.141e-10	0.1406
rs6484479	0.0243476	chr11-30274508-30361352	7.03e-11	0.1389
rs7116893	0.0184022	chr11-30274508-30361352	9.566e-11	-0.1412
rs7117691	0.016868	chr11-30274508-30361352	1.032e-10	-0.1409
rs7118949	0.0184022	chr11-30274508-30361352	9.459e-11	-0.1412
rs7121963	0.0206728	chr11-30274508-30361352	8.304e-11	-0.1416
rs7122449	0.0206728	chr11-30274508-30361352	8.325e-11	0.1416
rs7123626	0.014596	chr11-30274508-30361352	1.15e-10	0.1404
rs74331022	0.0150239	chr11-30274508-30361352	1.245e-10	0.1405
rs75525300	0.027449	chr11-30274508-30361352	6.018e-11	-0.1393
rs76959488	0.0137849	chr11-30274508-30361352	1.279e-10	0.1357
rs7926666	0.0154646	chr11-30274508-30361352	1.149e-10	0.1406
rs7929660	0.0266376	chr11-30274508-30361352	6.235e-11	-0.1392
rs7947350	0.0250876	chr11-30274508-30361352	6.678e-11	-0.139
rs7949790	0.0133803	chr11-30274508-30361352	1.194e-10	-0.1356
rs1081975	0.161956	chr12-55970537-56023144	4.628e-08	-0.0917
rs1873914	0.350118	chr12-55970537-56023144	9.252e-08	0.0881
rs773114	0.45866	chr12-55970537-56023144	9.701e-08	-0.0879
rs10035166	0.0445539	chr5-132454924-132499703	1.937e-10	0.1247
rs10051145	0.0160095	chr5-132454924-132499703	2.958e-09	0.1049
rs10053046	0.0159692	chr5-132454924-132499703	3.33e-09	0.1043
rs10065633	0.0241606	chr5-132454924-132499703	1.94e-09	0.1061
rs10068129	0.0171042	chr5-132454924-132499703	3.024e-09	-0.1045
rs10072571	0.0250086	chr5-132454924-132499703	1.933e-09	0.1062
rs10072700	0.0534981	chr5-132454924-132499703	1.663e-10	0.1254
rs10213701	0.0074231	chr5-132454924-132499703	6.246e-09	-0.1028
rs10214312	0.00688383	chr5-132454924-132499703	7.921e-09	0.1016
rs11952031	0.0258872	chr5-132454924-132499703	1.818e-09	-0.1063
rs11954400	0.0329939	chr5-132454924-132499703	1.497e-09	0.107
rs11958503	0.0252071	chr5-132454924-132499703	1.816e-09	0.1064
rs13164856	0.148257	chr5-132454924-132499703	1.453e-10	0.1235
rs13165038	0.0140667	chr5-132454924-132499703	2.374e-09	0.1079
rs13170412	0.00717939	chr5-132454924-132499703	6.332e-09	0.1027
rs17848418	0.0177025	chr5-132454924-132499703	2.967e-09	-0.1046
rs2070722	0.00931945	chr5-132454924-132499703	6.03e-09	0.1025
rs2070723	0.0103155	chr5-132454924-132499703	5.451e-09	0.1028
rs2070724	0.0106713	chr5-132454924-132499703	5.091e-09	0.1029
rs2070725	0.0114212	chr5-132454924-132499703	4.848e-09	-0.1031
rs2070726	0.0118163	chr5-132454924-132499703	4.668e-09	-0.1032
rs2070727	0.0196294	chr5-132454924-132499703	2.704e-09	-0.1049
rs2070728	0.0189642	chr5-132454924-132499703	2.816e-09	-0.1048
rs2070730	0.0189642	chr5-132454924-132499703	2.843e-09	-0.1048
rs2070731	0.014473	chr5-132454924-132499703	3.004e-09	0.105
rs2548999	0.00766676	chr5-132454924-132499703	6.906e-09	0.1025
rs2549002	0.00764145	chr5-132454924-132499703	6.392e-09	0.1026
rs2549004	0.00934366	chr5-132454924-132499703	5.506e-09	-0.1032
rs2549007	0.00659874	chr5-132454924-132499703	9.398e-09	-0.1014
rs3846731	0.0341616	chr5-132454924-132499703	1.552e-09	0.1071
rs3846732	0.0267975	chr5-132454924-132499703	1.817e-09	0.1064
rs61175929	0.0137334	chr5-132454924-132499703	3.553e-09	0.1074
rs6873269	0.020971	chr5-132454924-132499703	2.276e-09	-0.1056
rs6873426	0.020971	chr5-132454924-132499703	2.284e-09	-0.1056
rs6893937	0.0233421	chr5-132454924-132499703	1.975e-09	0.106
rs6894655	0.0224463	chr5-132454924-132499703	2.514e-09	0.1052
rs7701588	0.0196294	chr5-132454924-132499703	2.795e-09	0.1049
rs7719499	0.0186039	chr5-132454924-132499703	1.915e-09	0.1085
rs7734334	0.0307799	chr5-132454924-132499703	1.643e-09	-0.1068
rs7735073	0.0341616	chr5-132454924-132499703	1.473e-09	-0.1071
rs839	0.0210325	chr5-132454924-132499703	2.557e-09	-0.1051
rs9282761	0.0106713	chr5-132454924-132499703	5.149e-09	0.1029
rs9282762	0.00942983	chr5-132454924-132499703	5.256e-09	0.1037
rs9282763	0.00688383	chr5-132454924-132499703	7.88e-09	0.1016
rs10739076	1	chr9-5440589-5446078	2.51e-08	0.1097
rs11031005	0.538413	chr11-30193714-30240421	8.664e-13	-0.1593
rs11031006	0.418971	chr11-30193714-30240421	1.062e-12	0.1585
rs11075466	0.0504736	chr16-52322880-52345045	6.064e-09	-0.1206
rs11075467	0.0383687	chr16-52322880-52345045	7.401e-09	-0.1233
rs11075468	0.0663926	chr16-52322880-52345045	4.995e-09	0.1247
rs11639772	0.019382	chr16-52322880-52345045	1.186e-08	0.1204
rs11642495	0.022569	chr16-52322880-52345045	1.01e-08	-0.1185
rs11645791	0.0216876	chr16-52322880-52345045	1.026e-08	0.1184
rs12446616	0.0402173	chr16-52322880-52345045	7.224e-09	-0.124
rs12917708	0.0170851	chr16-52322880-52345045	1.229e-08	-0.1178
rs12918849	0.0434695	chr16-52322880-52345045	7.009e-09	0.1242
rs12918945	0.0192473	chr16-52322880-52345045	1.104e-08	-0.1181
rs12922116	0.0208411	chr16-52322880-52345045	1.055e-08	-0.1183
rs12927194	0.0200281	chr16-52322880-52345045	1.135e-08	0.1182
rs12927817	0.0350319	chr16-52322880-52345045	7.385e-09	-0.1196
rs146789487	0.0200281	chr16-52322880-52345045	1.144e-08	0.1182
rs28600983	0.0254806	chr16-52322880-52345045	9.363e-09	0.1211
rs28858446	0.0212034	chr16-52322880-52345045	7.573e-09	-0.1218
rs7186514	0.0200281	chr16-52322880-52345045	1.131e-08	-0.1182
rs7200621	0.0218796	chr16-52322880-52345045	9.973e-09	-0.1185
rs8043701	0.434236	chr16-52322880-52345045	9.61e-10	-0.1273
rs112599092	0.557314	chr2-212430962-212467117	1.003e-09	-0.1631
rs112919157	0.441955	chr2-212430962-212467117	1.331e-09	0.1621
rs16848753	0.0127745	chr2-212496910-212535309	5.363e-14	-0.165
rs2178575	0.309005	chr2-212496910-212535309	3.344e-14	0.1663
rs6435708	0.115898	chr2-212496910-212535309	3.855e-14	-0.1659
rs6435709	0.189235	chr2-212496910-212535309	3.643e-14	0.1661
rs7573568	0.309005	chr2-212496910-212535309	3.43e-14	-0.1663
rs7598042	0.0208502	chr2-212496910-212535309	4.967e-14	-0.1652
rs7563201	0.518921	chr2-43334632-43334641	3.678e-10	-0.1081
rs7589428	0.481079	chr2-43334632-43334641	5.117e-10	0.1052
rs10818873	0.18556	chr9-123730546-123806897	1.834e-10	-0.198
rs10986104	0.178291	chr9-123730546-123806897	1.933e-10	0.1978
rs2148953	0.100333	chr9-123730546-123806897	3.85e-10	-0.1949
rs3945628	0.144144	chr9-123730546-123806897	2.629e-10	-0.1961
rs4620350	0.237979	chr9-123730546-123806897	1.504e-10	-0.1986
rs7861905	0.152014	chr9-123730546-123806897	2.286e-10	0.197
rs12000707	0.114967	chr9-123807373-123903778	1.761e-10	-0.1983
rs12237146	0.188564	chr9-123807373-123903778	1.092e-10	0.2014
rs16926913	0.188564	chr9-123807373-123903778	1.096e-10	0.2014
rs7028482	0.050936	chr9-123807373-123903778	4.156e-10	-0.2148
rs7030193	0.0604365	chr9-123807373-123903778	3.378e-10	-0.1982
rs7042633	0.0738462	chr9-123807373-123903778	3.04e-10	0.1986
rs7871250	0.0763288	chr9-123807373-123903778	2.603e-10	0.1994
rs9696009	0.242948	chr9-123807373-123903778	7.958e-11	0.202
rs10501995	0.0168892	chr11-102123167-102220513	1.923e-09	-0.1672
rs11225154	0.880886	chr11-102123167-102220513	5.438e-11	0.1787
rs11225158	0.0143703	chr11-102123167-102220513	2.537e-09	0.1665
rs11225161	0.0198619	chr11-102123167-102220513	1.707e-09	0.1679
rs1894116	0.0198702	chr11-102123167-102220513	1.87e-09	-0.1673
rs12223987	0.999589	chr11-30373901-30415237	6.157e-10	0.1336
rs2640562	0.563424	chr12-56034024-56114625	2.442e-08	0.0968
rs3741499	0.0855201	chr12-56034024-56114625	2.946e-08	0.0951
rs4759229	0.101614	chr12-56034024-56114625	2.812e-08	0.0953
rs705696	0.162789	chr12-56034024-56114625	5.651e-08	0.0932
rs877636	0.0767169	chr12-56034024-56114625	4.336e-08	-0.0938
rs10879927	0.0313443	chr12-75500085-75594107	4.968e-09	0.1102
rs10879928	0.0343366	chr12-75500085-75594107	4.162e-09	0.1105
rs1147994	0.0151616	chr12-75500085-75594107	9.493e-09	-0.1181
rs1148000	0.037104	chr12-75500085-75594107	3.854e-09	-0.1137
rs1148002	0.0530998	chr12-75500085-75594107	2.837e-09	-0.1149
rs1148003	0.0187379	chr12-75500085-75594107	8.242e-09	0.1108
rs1148004	0.020122	chr12-75500085-75594107	7.23e-09	-0.1122
rs1148005	0.0106934	chr12-75500085-75594107	1.434e-08	-0.11
rs1275468	0.0786288	chr12-75500085-75594107	1.868e-09	-0.1162
rs1275469	0.0360182	chr12-75500085-75594107	4.039e-09	-0.1136
rs1275471	0.0104925	chr12-75500085-75594107	1.579e-08	0.1122
rs1275472	0.0167958	chr12-75500085-75594107	8.306e-09	-0.1087
rs1275474	0.0304077	chr12-75500085-75594107	5.061e-09	0.1101
rs1383098	0.0249043	chr12-75500085-75594107	5.921e-09	0.1205
rs1480001	0.0288071	chr12-75500085-75594107	4.589e-09	-0.1222
rs1480002	0.0286866	chr12-75500085-75594107	5.001e-09	-0.1216
rs1627431	0.0230639	chr12-75500085-75594107	6.461e-09	-0.1208
rs1630753	0.0264287	chr12-75500085-75594107	5.63e-09	-0.1213
rs1679381	0.0284276	chr12-75500085-75594107	5.429e-09	-0.1128
rs1679384	0.0206916	chr12-75500085-75594107	7.218e-09	-0.1204
rs1697753	0.021379	chr12-75500085-75594107	6.656e-09	-0.1211
rs17115231	0.0382236	chr12-75500085-75594107	3.823e-09	0.1138
rs1795374	0.0279127	chr12-75500085-75594107	5.373e-09	-0.1215
rs1795379	0.0785309	chr12-75500085-75594107	1.808e-09	-0.1174
rs1795380	0.0159091	chr12-75500085-75594107	8.936e-09	-0.12
rs1795382	0.0127528	chr12-75500085-75594107	1.135e-08	-0.1186
rs1824982	0.0140678	chr12-75500085-75594107	1.031e-08	0.1081
rs2366987	0.0252273	chr12-75500085-75594107	5.974e-09	0.1089
rs2620687	0.0159091	chr12-75500085-75594107	9.01e-09	-0.12
rs2652022	0.0134525	chr12-75500085-75594107	1.075e-08	-0.1188
rs3847669	0.0313151	chr12-75500085-75594107	4.563e-09	0.1143
rs3858534	0.0313151	chr12-75500085-75594107	4.589e-09	0.1143
rs6582292	0.0417956	chr12-75500085-75594107	3.495e-09	0.1141
rs7955269	0.012376	chr12-75500085-75594107	1.155e-08	-0.1145
rs187178	0.0444858	chr20-32783871-32880307	5.184e-08	0.0888
rs242528	0.036174	chr20-32783871-32880307	5.822e-08	0.0887
rs242535	0.0506545	chr20-32783871-32880307	4.567e-08	-0.0892
rs242536	0.0523307	chr20-32783871-32880307	4.44e-08	0.0893
rs242538	0.0506545	chr20-32783871-32880307	4.525e-08	-0.0892
rs242540	0.0444858	chr20-32783871-32880307	5.166e-08	0.0888
rs242544	0.0366525	chr20-32783871-32880307	6.278e-08	0.0882
rs242547	0.0905472	chr20-32783871-32880307	2.626e-08	0.0932
rs242548	0.0506545	chr20-32783871-32880307	4.462e-08	0.0892
rs242551	0.0444858	chr20-32783871-32880307	5.266e-08	0.0888
rs242553	0.0444858	chr20-32783871-32880307	5.197e-08	0.0888
rs401394	0.0737152	chr20-32783871-32880307	2.842e-08	0.0909
rs404543	0.036174	chr20-32783871-32880307	6.332e-08	0.0887
rs416815	0.0506545	chr20-32783871-32880307	4.55e-08	-0.0892
rs447749	0.0523307	chr20-32783871-32880307	4.407e-08	-0.0893
rs66499347	0.019658	chr20-32783871-32880307	1.27e-07	0.0873
rs709047	0.0540643	chr20-32783871-32880307	4.257e-08	0.0894
rs73114154	0.00705748	chr20-32783871-32880307	3.606e-07	0.0875
rs853853	0.0289478	chr20-32783871-32880307	8.583e-08	0.088
rs853859	0.0459512	chr20-32783871-32880307	5.136e-08	0.0889
rs853863	0.0390912	chr20-32783871-32880307	6.103e-08	0.0884
rs10993377	0.051714	chr9-94865485-94908276	4.385e-07	-0.0839
rs2183958	0.687742	chr9-94865485-94908276	3e-08	0.0917
rs4385527	0.0433524	chr9-94865485-94908276	5.179e-07	-0.0833
rs4744403	0.173097	chr9-94865485-94908276	1.24e-07	-0.0879
rs10821415	0.0709848	chr9-94915274-94969974	6.453e-08	-0.0902
rs10993394	0.100754	chr9-94915274-94969974	5.087e-08	-0.09
rs10993397	0.100754	chr9-94915274-94969974	5.011e-08	-0.09
rs10993398	0.0974604	chr9-94915274-94969974	5.276e-08	0.0899
rs1123534	0.0550302	chr9-94915274-94969974	7.877e-08	0.0894
rs12235316	0.0942778	chr9-94915274-94969974	5.397e-08	0.0898
rs4744411	0.0566805	chr9-94915274-94969974	8.565e-08	-0.0884
rs7853195	0.0646018	chr9-94915274-94969974	7.528e-08	-0.0888
rs7864171	0.163533	chr9-94915274-94969974	2.946e-08	-0.0933
rs7865239	0.167923	chr9-94915274-94969974	3.137e-08	-0.0936

## Sheet: Supplementary Table S4
Supplementary Table S4: Biological processes significantly enriched for PCOS-associated variants identified by MAGMA analysis (p-value < 0.01).​
GO_BP	Gene num	P-value
GOBP_CAMP_PKA_SIGNAL_TRANSDUCTION	5	0.0029836
GOBP_CD4_POSITIVE_ALPHA_BETA_T_CELL_PROLIFERATION	21	0.0060699
GOBP_CELLULAR_RESPONSE_TO_INSULIN_STIMULUS	208	0.0016546
GOBP_CELLULAR_RESPONSE_TO_PEPTIDE_HORMONE_STIMULUS	309	0.0017923
GOBP_LYMPHOCYTE_ANERGY	7	0.00056763
GOBP_MITOCHONDRIAL_GENOME_MAINTENANCE	30	0.0033881
GOBP_NEGATIVE_REGULATION_OF_ALPHA_BETA_T_CELL_PROLIFERATION	15	0.0016212
GOBP_NEGATIVE_REGULATION_OF_CD4_POSITIVE_ALPHA_BETA_T_CELL_PROLIFERATION	11	0.0032315
GOBP_NEGATIVE_REGULATION_OF_T_CELL_MIGRATION	6	0.0054848
GOBP_POSITIVE_REGULATION_OF_T_CELL_TOLERANCE_INDUCTION	8	0.0051671
GOBP_PROGRAMMED_CELL_DEATH_IN_RESPONSE_TO_REACTIVE_OXYGEN_SPECIES	13	0.0026144
GOBP_REGULATION_OF_LIPID_TRANSPORTER_ACTIVITY	4	0.0048125
GOBP_RESPONSE_TO_PEPTIDE_HORMONE	431	0.00080987
GOBP_STEROID_HORMONE_BIOSYNTHETIC_PROCESS	44	0.0039849
GOBP_T_CELL_TOLERANCE_INDUCTION	14	0.0021325

## Sheet: Supplementary Table S5
Supplementary Table S5. Colocalization analysis results between PCOS GWAS loci and sc-eQTLs across immune cell types (PPH4>0.75)
PPH0	PPH1	PPH2	PPH3	PPH4	Num of SNPs	Celltype	Loci	Gene name
0.000139298	0.11846	5.87618e-05	0.0491391	0.832203	2567	Natural_Killer_Cell	chr12-55970537-56023144	SUOX
9.32289e-284	7.76002e-281	1.11528e-05	0.00829146	0.991697	2533	CD4_Effector_memory	chr12-56034024-56114625	RPS26
3.21704e-292	2.67774e-289	1.11528e-05	0.00829146	0.991697	2533	CD4_Naive	chr12-56034024-56114625	RPS26
1.10255e-230	9.37616e-228	3.41888e-05	0.0281025	0.971863	2534	CD4_SOX4	chr12-56034024-56114625	RPS26
1.45703e-291	1.21278e-288	1.11528e-05	0.00829146	0.991697	2533	CD8_Effector_memory	chr12-56034024-56114625	RPS26
1.45157e-285	1.20823e-282	1.11528e-05	0.00829146	0.991697	2533	CD8_Naive	chr12-56034024-56114625	RPS26
6.197e-280	5.15815e-277	1.11528e-05	0.00829146	0.991697	2533	CD8_S100B	chr12-56034024-56114625	RPS26
7.12234e-273	6.05687e-270	3.41888e-05	0.0281025	0.971863	2534	Classic_Monocyt	chr12-56034024-56114625	RPS26
1.79671e-298	1.47685e-295	5.30595e-05	0.0426565	0.95729	2533	Dendritic_Cell	chr12-56034024-56114625	RPS26
3.728e-286	3.10305e-283	1.11528e-05	0.00829146	0.991697	2533	Memory_B_Cell	chr12-56034024-56114625	RPS26
1.61717e-284	1.34607e-281	1.11528e-05	0.00829146	0.991697	2533	Naive_B_cell	chr12-56034024-56114625	RPS26
7.15572e-295	5.95616e-292	1.11528e-05	0.00829145	0.991697	2533	Natural_Killer_Cell	chr12-56034024-56114625	RPS26
8.09312e-303	6.65237e-300	5.30595e-05	0.0426565	0.95729	2533	Natural_Killer_Recruiting_Cell	chr12-56034024-56114625	RPS26
4.04903e-252	3.44331e-249	3.41888e-05	0.0281025	0.971863	2534	Non-classic_Monocyte	chr12-56034024-56114625	RPS26
2.35238e-06	0.000626098	0.000208891	0.0546528	0.94451	2650	CD4_Naive	chr20-32783871-32880307	MAPRE1
9.49277e-06	0.00252655	0.000164926	0.0429415	0.954358	2650	CD8_S100B	chr20-32783871-32880307	MAPRE1
0.000192047	0.0511142	0.000409622	0.108183	0.840101	2650	Natural_Killer_Cell	chr20-32783871-32880307	MAPRE1
2.12621e-06	0.0392594	4.50919e-06	0.0823816	0.878352	2887	CD4_Effector_memory	chr5-132454924-132499703	IRF1
1.06344e-07	0.00196359	5.21344e-06	0.095361	0.90267	2887	CD4_Naive	chr5-132454924-132499703	IRF1
3.10604e-06	0.0573515	8.79847e-06	0.161678	0.780958	2887	CD8_Naive	chr5-132454924-132499703	IRF1
